# Supplementary material
Source: Copernicus journal article supplement (doi:10.5194/acp-26-8913-2026)
Supplement: Supplementary file 1 [file acp-26-8913-2026-supplement.pdf]

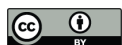

*Supplement of*

**Technical note: Rapid assessment of drivers and air quality effects of regional daily changes in air pollutant emissions based on near-real-time techniques**

Chen Gu et al.

*Correspondence to:* Yu Zhao (yuzhao@nju.edu.cn)

The copyright of individual parts of the supplement might differ from the article licence.

## **Table List**

**Table S1** Comparisons between observed and simulated meteorological parameters in D3. OBS and SIM represent observation and simulation, respectively. (T2: temperature at 2 m; WS10: wind speed at 10 m; RH2: relative humidity at 2 m). Criteria are taken from Emery et al. (Emery, C., Liu, Z., Russell, A. G., Odman, M. T., Yarwood, G., and Kumar, N.: Recommendations on statistics and benchmarks to assess photochemical model performance, *J. Air Waste Manag. Assoc.*, 67, 582-598, 10.1080/10962247.2016.1265027, 2017).

**Table S2** City-level variations in air pollutant emissions across representative cities in Jiangsu Province during the lockdown (April-May 2022) versus the baseline period (April-May 2023).

**Table S3** Comparison of the observed and simulated concentrations of specific air pollutants for selected months in Jiangsu. In total, 110 state-operated observation sites were included in the comparison.

## Figure List

**Figure S1** The locations of Jiangsu Province and the spatial distribution of ground observation stations. The map data provided by Resource and Environment Data Cloud Platform are freely available for academic use (<http://www.resdc.cn/data.aspx?DATAID=201>), © Institute of Geographic Sciences & Natural Resources Research, Chinese Academy of Sciences.

**Figure S2** Air pollutant emissions by sector for Jiangsu in 2015, 2019, and 2022. (a) SO<sub>2</sub>; (b) NO<sub>x</sub>; (c) PM<sub>2.5</sub>; (d) NMVOCs; (e) NH<sub>3</sub>.

**Figure S3** The temporal profiles of NO<sub>x</sub> emissions for key sectors for Jiangsu in 2022. From top to bottom are residential, aviation, diesel locomotive, marine, agricultural machinery, on-road vehicles, industry, and power sectors.

**Figure S4** The daily population migration index for Jiangsu in 2022.

**Figure S5** The comparison between the observed daily SO<sub>2</sub> concentrations and those simulated with different emission inventories (this work and MEIC) for January, April, July and October 2022 for Jiangsu Province.

**Figure S6** The comparison between the observed daily NO<sub>2</sub> concentrations and those simulated with different emission inventories (this work and MEIC) for January, April, July and October 2022 for Jiangsu Province.

**Figure S7** Spatial distribution of SO<sub>2</sub> concentrations for Jiangsu in 2022 simulated with CMAQ. (a) January; (b) April; (c) July; and (d) October.

**Figure S8** Spatial distribution of NO<sub>2</sub> concentrations for Jiangsu in 2022 simulated with CMAQ. (a) January; (b) April; (c) July; and (d) October.

**Figure S9** Spatial distribution of PM<sub>2.5</sub> concentrations for Jiangsu in 2022 simulated with CMAQ. (a) January; (b) April; (c) July; and (d) October.

**Figure S10** Spatial distribution of O<sub>3</sub> concentrations for Jiangsu in 2022 simulated with CMAQ. (a) January; (b) April; (c) July; and (d) October.

**Figure S11** The observed and MLR-derived daily concentration of PM<sub>2.5</sub> (a) and O<sub>3</sub> (b) for Jiangsu in 2022.

**Figure S12** Ten-fold cross valuation scatterplots of the daily variability of PM<sub>2.5</sub> (a) (January 2022) and MDA8 O<sub>3</sub> (b) concentration (July 2022) attributed to the changing emissions in Jiangsu.

**Table S1** Comparisons between observed and simulated meteorological parameters in D3. OBS and SIM represent observation and simulation, respectively. (T2: temperature at 2 m; WS10: wind speed at 10 m; RH2: relative humidity at 2 m). Criteria are taken from Emery et al. (Emery, C., Liu, Z., Russell, A. G., Odman, M. T., Yarwood, G., and Kumar, N.: Recommendations on statistics and benchmarks to assess photochemical model performance, *J. Air Waste Manag. Assoc.*, 67, 582-598, 10.1080/10962247.2016.1265027, 2017).

| Meteorological parameters | Evaluation metrics | Jan   | Apr   | Jul   | Oct   | Criterion      |
|---------------------------|--------------------|-------|-------|-------|-------|----------------|
| WS10                      | OBS (m/s)          | 2.84  | 3.10  | 2.85  | 2.55  |                |
|                           | SIM (m/s)          | 3.53  | 3.48  | 3.33  | 3.13  |                |
|                           | Bias (m/s)         | 0.51  | 0.27  | 0.33  | 0.45  | $\leq \pm 0.5$ |
|                           | RMSE (m/s)         | 2.25  | 2.11  | 1.82  | 2.2   | $\leq 2.0$     |
|                           | IOA                | 0.71  | 0.71  | 0.73  | 0.68  | $\geq 0.6$     |
| T2                        | OBS (°C)           | 3.18  | 17.89 | 28.84 | 17.60 |                |
|                           | SIM (°C)           | 3.92  | 17.35 | 28.57 | 17.73 |                |
|                           | Bias (°C)          | 0.53  | -0.22 | -0.35 | -0.17 | $\leq \pm 0.5$ |
|                           | RMSE (°C)          | 1.96  | 0.99  | 0.87  | 1.03  | $\leq 2.0$     |
|                           | IOA                | 0.95  | 0.98  | 0.99  | 0.94  | $\geq 0.8$     |
| RH2                       | OBS (%)            | 73.09 | 68.08 | 78.00 | 64.65 |                |
|                           | SIM (%)            | 67.42 | 62.01 | 71.31 | 56.47 |                |
|                           | Bias (%)           | -4.01 | -6.06 | -6.88 | -7.43 |                |
|                           | RMSE (%)           | 12.27 | 16.85 | 15.22 | 16.28 |                |
|                           | IOA                | 0.97  | 0.99  | 0.97  | 0.92  | $\geq 0.7$     |

**Table S2** City-level variations in air pollutant emissions across representative cities in Jiangsu Province during the lockdown (April-May 2022) versus the baseline period (April-May 2023).

| City                         | Pollutant         | Baseline<br>(tons)<br>(April-May 2023) | Lockdown<br>(tons)<br>(April-May 2022) | Emission<br>reduction<br>(tons) | Relative<br>change<br>(%) |
|------------------------------|-------------------|----------------------------------------|----------------------------------------|---------------------------------|---------------------------|
| Suzhou<br>(Southern Jiangsu) | SO <sub>2</sub>   | 9358                                   | 8516                                   | -842                            | -9.0%                     |
|                              | NO <sub>x</sub>   | 19193                                  | 16276                                  | -2917                           | -15.2%                    |
|                              | PM <sub>2.5</sub> | 8066                                   | 7018                                   | -1048                           | -13.0%                    |
|                              | NMVOCs            | 38059                                  | 31247                                  | -6812                           | -17.9%                    |
| Nantong<br>(Central Jiangsu) | SO <sub>2</sub>   | 2643                                   | 2513                                   | -130                            | -4.9%                     |
|                              | NO <sub>x</sub>   | 7106                                   | 6453                                   | -653                            | -9.2%                     |
|                              | PM <sub>2.5</sub> | 2971                                   | 2770                                   | -201                            | -6.8%                     |
|                              | NMVOCs            | 23109                                  | 21121                                  | -1988                           | -8.6%                     |
| Xuzhou<br>(Northern Jiangsu) | SO <sub>2</sub>   | 5764                                   | 5593                                   | -171                            | -3.0%                     |
|                              | NO <sub>x</sub>   | 15204                                  | 14850                                  | -354                            | -2.3%                     |
|                              | PM <sub>2.5</sub> | 4542                                   | 4413                                   | -129                            | -2.8%                     |
|                              | NMVOCs            | 14534                                  | 14102                                  | -432                            | -3.0%                     |

**Table S3** Comparison of the observed and simulated concentrations of specific air pollutants for selected months in Jiangsu. In total, 110 state-operated observation sites were included in the comparison.

| Species           | Period  | Observation                  | Simulation                                | R <sup>2</sup> |      | NMB (%)   |       | NME (%)   |      |
|-------------------|---------|------------------------------|-------------------------------------------|----------------|------|-----------|-------|-----------|------|
|                   |         | ( $\mu\text{g}/\text{m}^3$ ) | ( $\mu\text{g}/\text{m}^3$ )<br>This work | This work      | MEIC | This work | MEIC  | This work | MEIC |
| SO <sub>2</sub>   | 2022/1  | 11.9                         | 14.6                                      | 0.49           | 0.41 | 23.0      | 24.1  | 53.5      | 49.0 |
|                   | 2022/4  | 16.1                         | 14.4                                      | 0.44           | 0.32 | -26.7     | -30.4 | 33.7      | 45.6 |
|                   | 2022/7  | 10.7                         | 11.1                                      | 0.44           | 0.36 | 24.1      | 25.5  | 38.6      | 40.9 |
|                   | 2022/10 | 16.7                         | 14.1                                      | 0.57           | 0.43 | -37.1     | -33.4 | 51.2      | 51.8 |
| NO <sub>2</sub>   | 2022/1  | 78.0                         | 71.1                                      | 0.59           | 0.55 | -2.5      | -16.1 | 15.9      | 24.3 |
|                   | 2022/4  | 59.0                         | 61.5                                      | 0.37           | 0.30 | 21.3      | 30.0  | 36.2      | 55.1 |
|                   | 2022/7  | 45.7                         | 54.5                                      | 0.45           | 0.38 | 27.0      | 35.6  | 25.8      | 22.3 |
|                   | 2022/10 | 72.1                         | 60.1                                      | 0.47           | 0.44 | -20.2     | -19.9 | 26.2      | 31.7 |
| PM <sub>2.5</sub> | 2022/1  | 108.1                        | 108.9                                     | 0.58           | 0.47 | 10.8      | 14    | 33.2      | 37.5 |
|                   | 2022/4  | 61.8                         | 56.7                                      | 0.38           | 0.29 | -18.6     | 21.7  | 39.2      | 55.3 |
|                   | 2022/7  | 40.8                         | 39.7                                      | 0.39           | 0.25 | -3.2      | 25.2  | 48.1      | 62.5 |
|                   | 2022/10 | 41.5                         | 31.7                                      | 0.49           | 0.38 | -1.91     | -8.58 | 42.6      | 51.3 |
| O <sub>3</sub>    | 2022/1  | 79.2                         | 66.9                                      | 0.66           | 0.30 | -23.1     | -39.1 | 49.3      | 51.4 |
|                   | 2022/4  | 203.2                        | 159.3                                     | 0.46           | 0.26 | -41.2     | -30.6 | 41.1      | 54.0 |
|                   | 2022/7  | 158.8                        | 130.4                                     | 0.62           | 0.56 | -24.2     | -28.1 | 32.7      | 44.3 |
|                   | 2022/10 | 128.8                        | 102.3                                     | 0.52           | 0.32 | -30.5     | -39.9 | 44.6      | 54.5 |

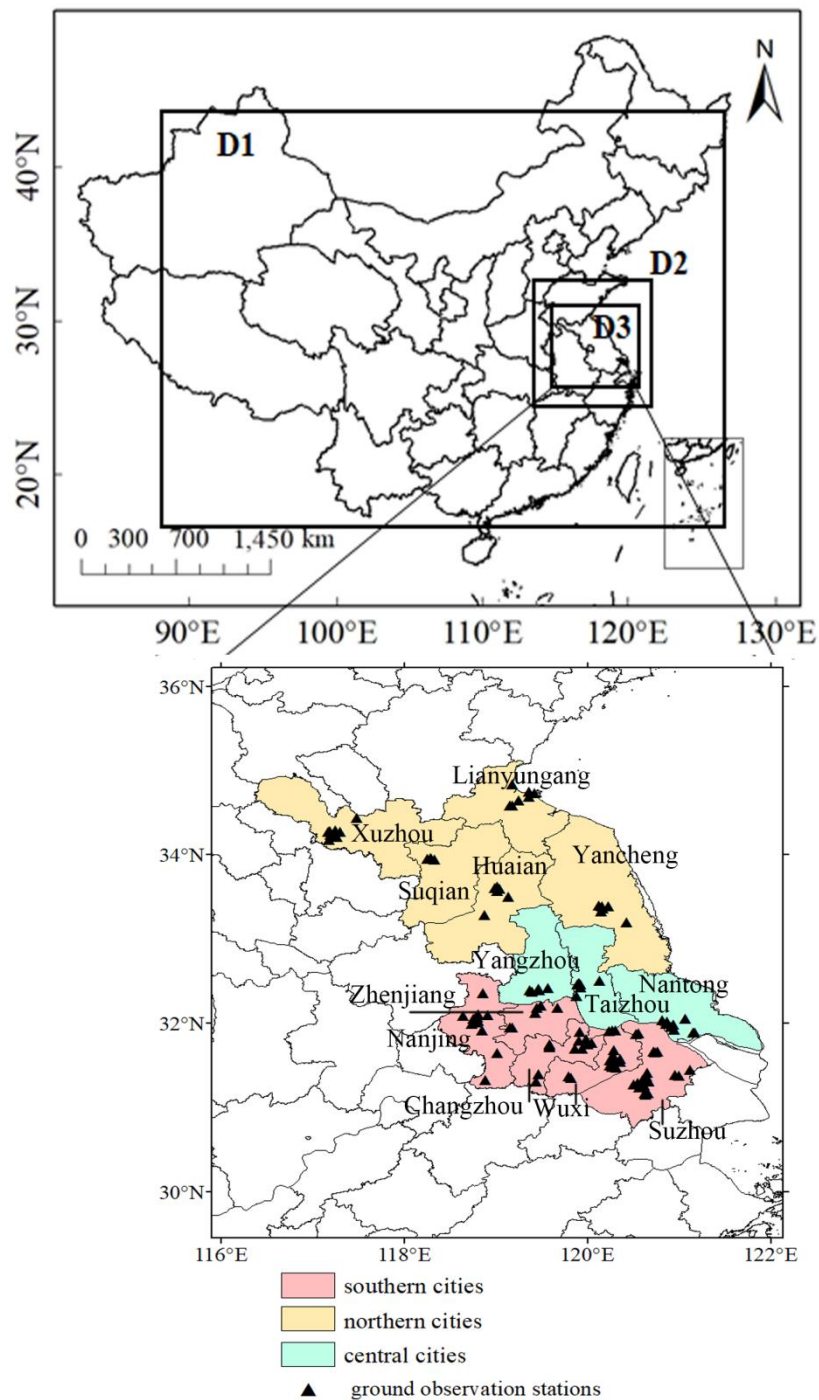

**Figure S1** The locations of Jiangsu Province and the spatial distribution of ground observation stations. The map data provided by Resource and Environment Data Cloud Platform are freely available for academic use (<http://www.resdc.cn/data.aspx?DATAID=201>), © Institute of Geographic Sciences &

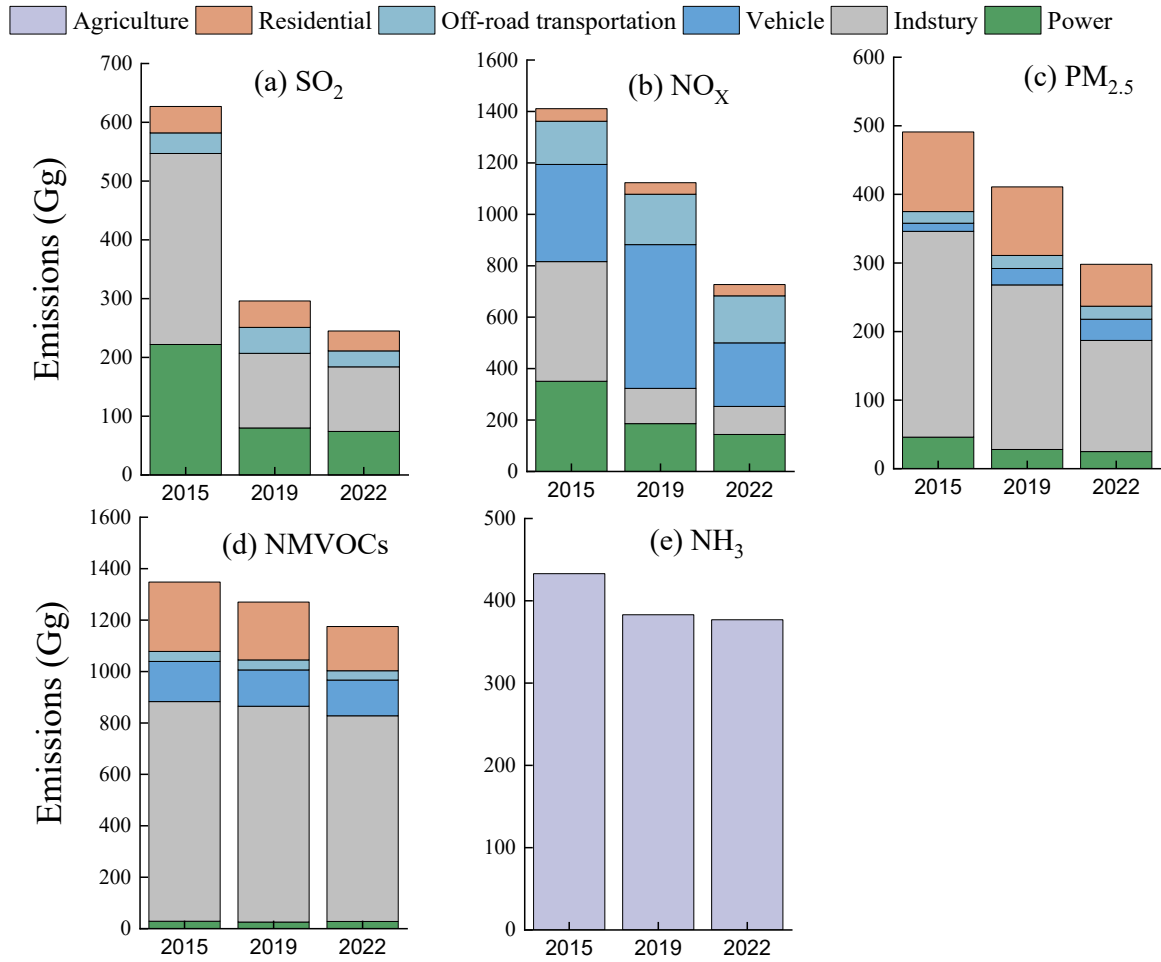

**Figure S2** Air pollutant emissions by sector for Jiangsu in 2015, 2019, and 2022. (a)  $\text{SO}_2$ ; (b)  $\text{NO}_x$ ; (c)  $\text{PM}_{2.5}$ ; (d) NMVOCs; (e)  $\text{NH}_3$ .

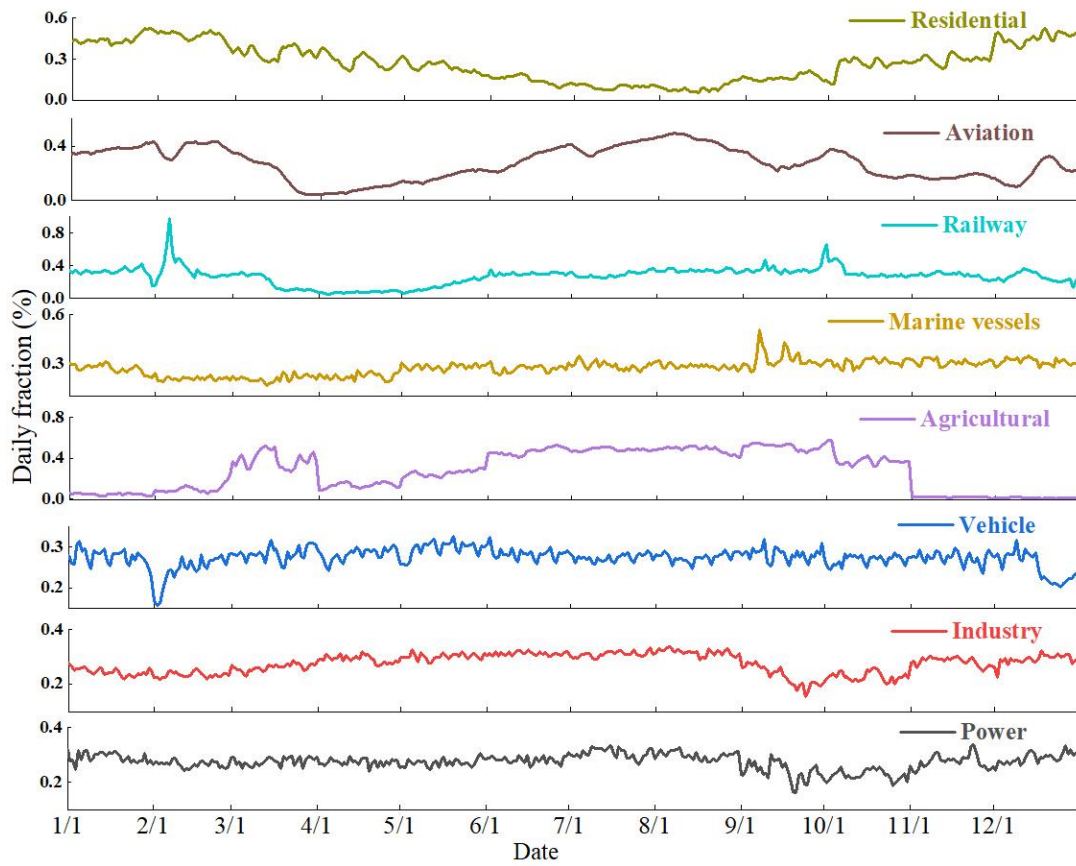

**Figure S3** The temporal profiles of NO<sub>x</sub> emissions for key sectors for Jiangsu in 2022. From top to bottom are residential, aviation, diesel locomotive, marine, agricultural machinery, on-road vehicles, industry, and power sectors.

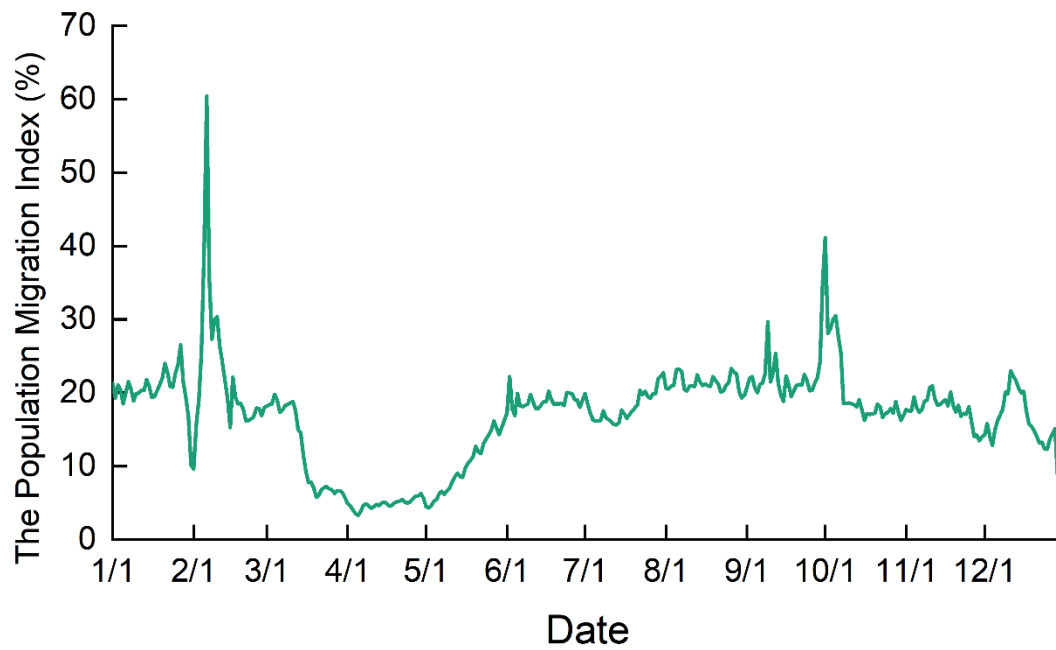

**Figure S4** The daily population migration index for Jiangsu in 2022.

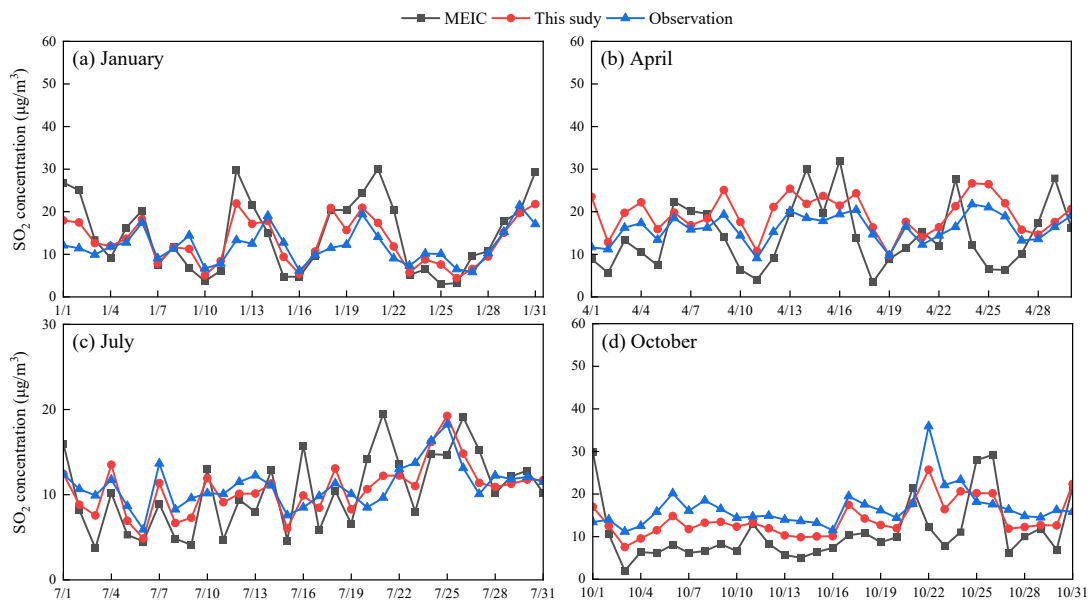

**Figure S5** The comparison between the observed daily SO<sub>2</sub> concentrations and those simulated with different emission inventories (this work and MEIC) for January, April, July and October 2022 for Jiangsu Province.

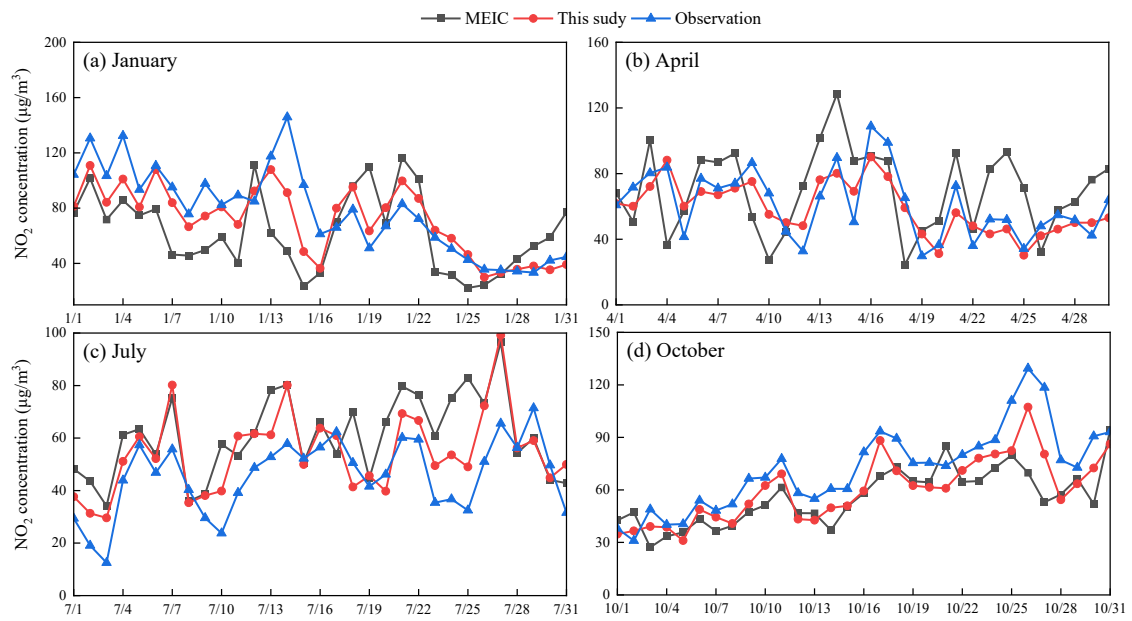

**Figure S6** The comparison between the observed daily NO<sub>2</sub> concentrations and those simulated with different emission inventories (this work and MEIC) for January, April, July and October 2022 for Jiangsu Province.

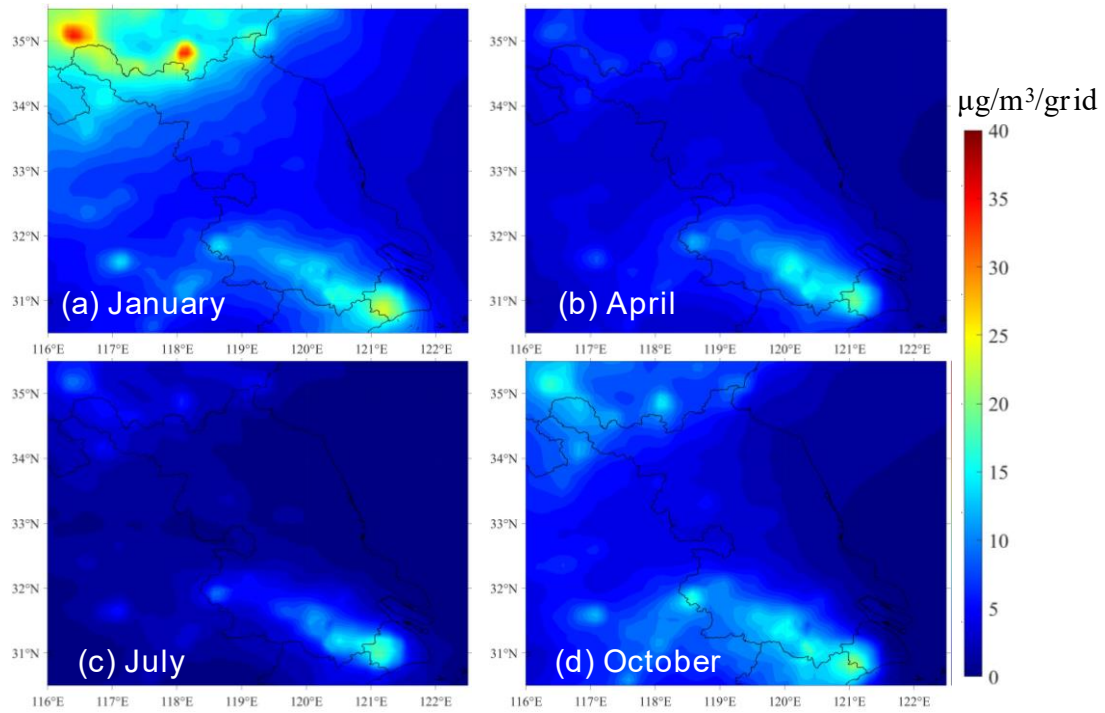

**Figure S7** Spatial distribution of SO<sub>2</sub> concentrations for Jiangsu in 2022 simulated with CMAQ. (a) January; (b) April; (c) July; and (d) October.

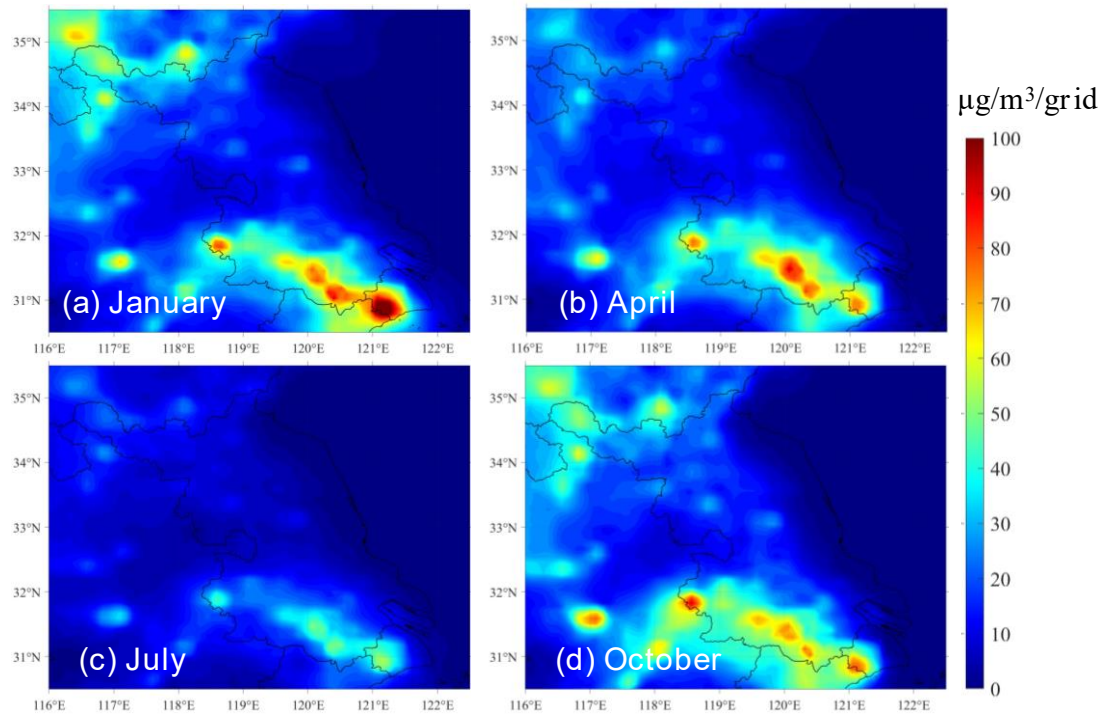

**Figure S8** Spatial distribution of NO<sub>2</sub> concentrations for Jiangsu in 2022 simulated with CMAQ. (a) January; (b) April; (c) July; and (d) October.

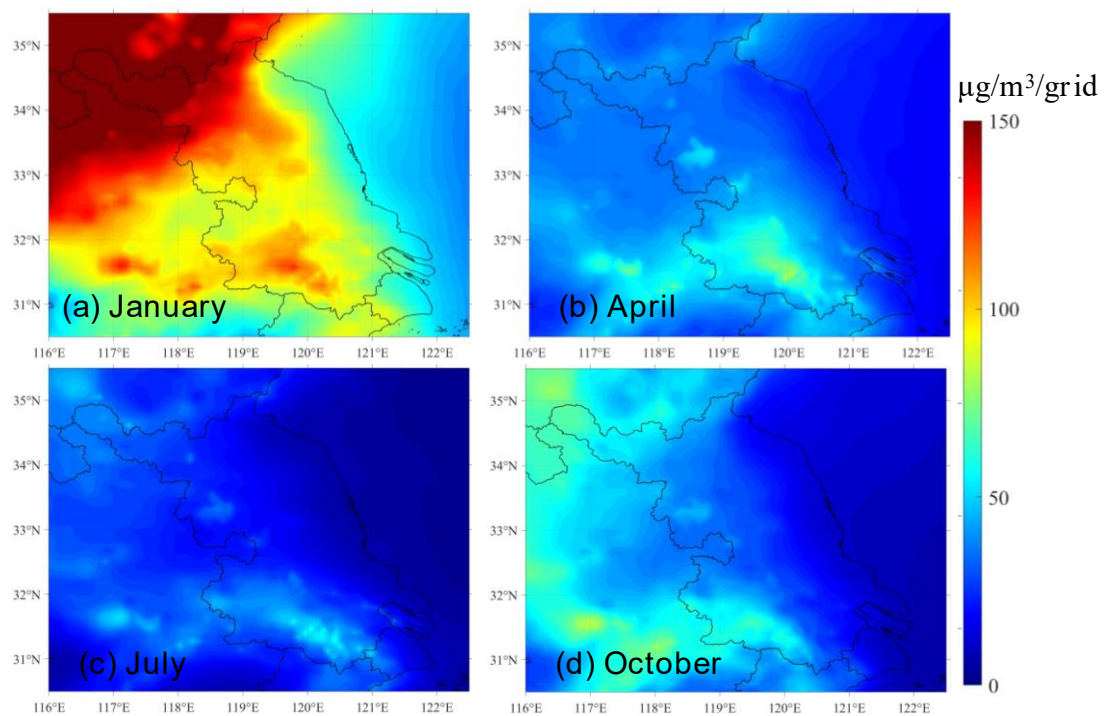

**Figure S9** Spatial distribution of PM<sub>2.5</sub> concentrations for Jiangsu in 2022 simulated with CMAQ. (a) January; (b) April; (c) July; and (d) October.

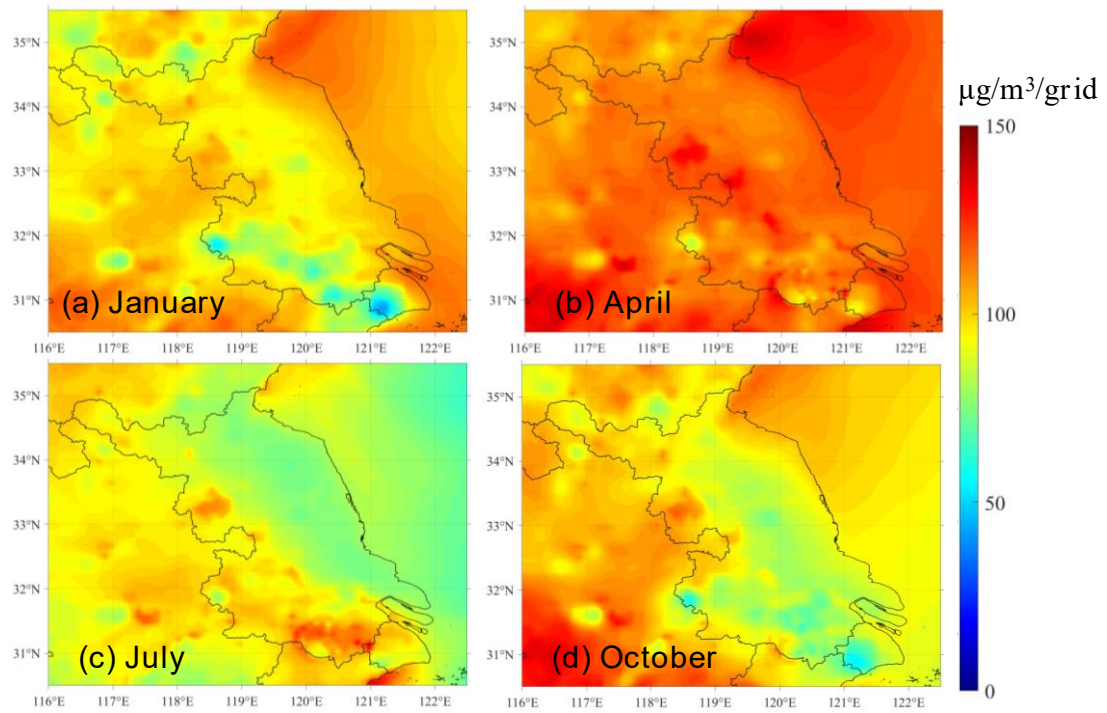

**Figure S10** Spatial distribution of O<sub>3</sub> concentrations for Jiangsu in 2022 simulated with CMAQ. (a) January; (b) April; (c) July; and (d) October.

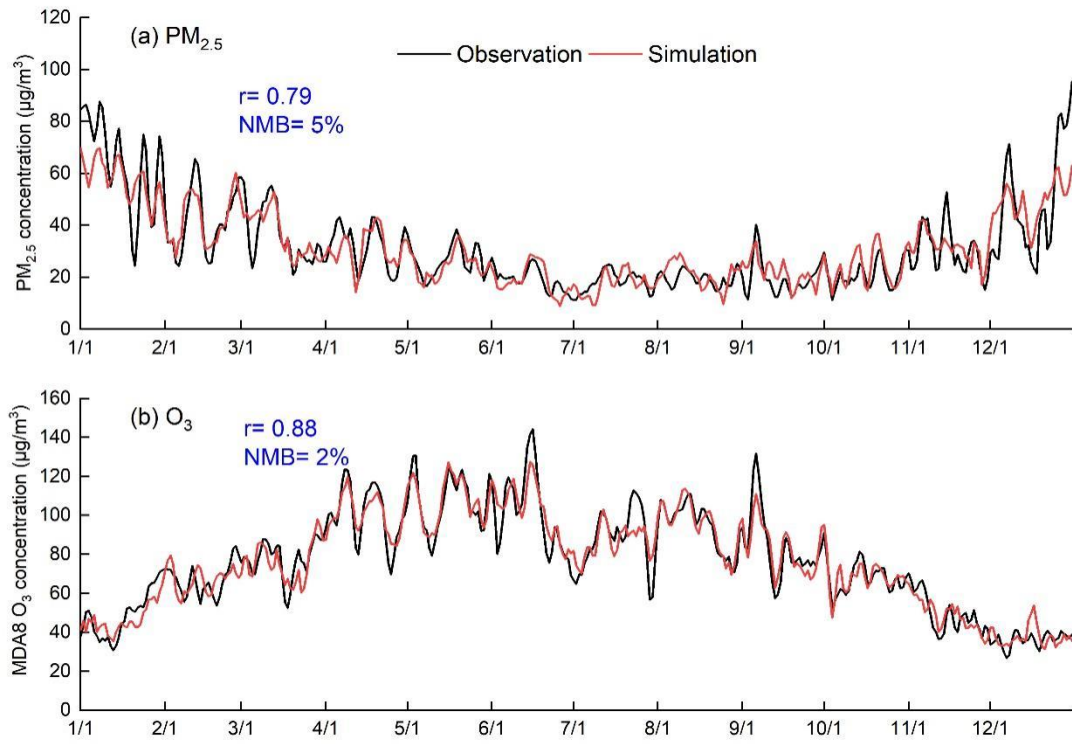

**Figure S11** The observed and MLR-derived daily concentration of  $PM_{2.5}$  (a) and  $O_3$  (b) for Jiangsu in 2022.

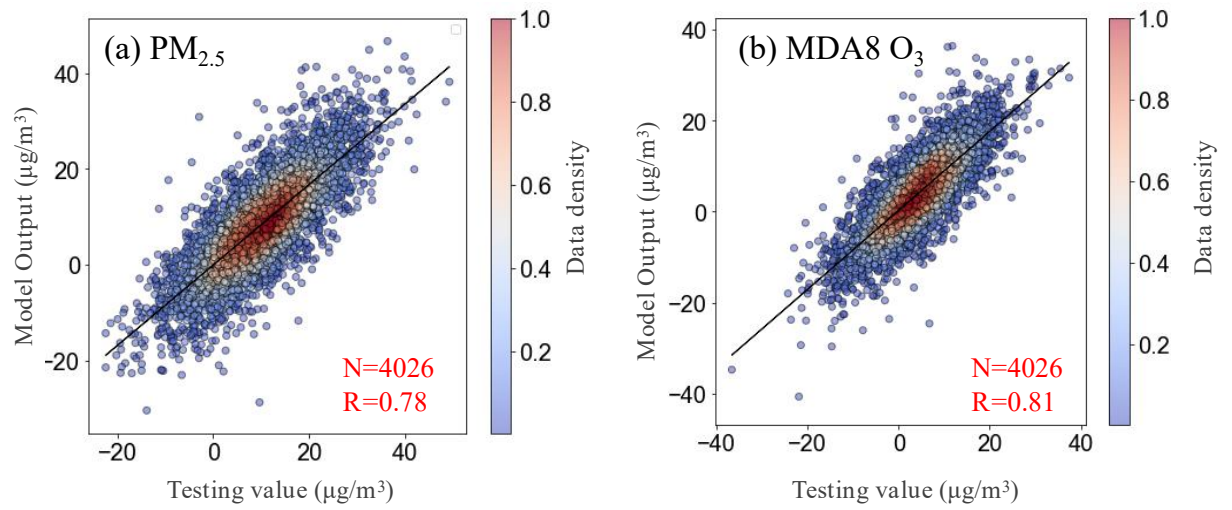

**Figure S12** Ten-fold cross valuation scatterplots of the daily variability of  $PM_{2.5}$  (a) (January 2022) and MDA8  $O_3$  (b) concentration (July 2022) attributed to the changing emissions in Jiangsu.
